# Supplementary material for: Carbon mineralization in Laptev and East Siberian Sea shelf and slope sediment
Source: Copernicus journal article supplement (doi:10.5194/bg-2017-119), 2017-04-13
Supplement: Supplementary file [file bg-2017-119-AC2-supplement.pdf]

## Reply to anonymous Referee #2

**Please note that our answers are written to each comment in italic type.**

The manuscript "Carbon mineralization in Laptev Sea and East Siberian Sea shelf and slope sediment" of Brüchert and co-workers describes interesting sediment data from 19 different stations in the East Siberian Sea. The authors measured depth profiles of geochemical data such as DIC concentrations and their stable isotope signatures, oxygen, sulfate and ammonium concentrations as well as process data of sulfate reduction and oxygen consumption. Furthermore, they used the profile data of manganese and iron to model manganese and iron reduction rates. Based on DIC stable isotope signatures and the fraction of DIC from organic matter mineralization they derived the contribution of marine and terrestrial organic matter to overall organic matter decomposition using a common endmember model. Finally they upscaled their data to the outer Laptev Sea and the outer East Siberian Sea. This is an impressive data set from a region, which is only hardly accessible and of which only few data are available. The presented data are of great interest for readers of Biogeosciences and worth being published.

However, the presentation and interpretation of the data need substantial improvement. The manuscript is very long and contains substantial reiterations. But more importantly, a part of the manuscript has the classical structure of Introduction, M&M, Results and Discussion, but a large fraction of Methods and Results is presented in the Discussion only.

*Answer: We appreciate the reviewer's view of our manuscript structure. However, the part of the discussion the reviewer refers to includes the development of a mass balance model to assess the marine versus terrestrial organic matter contribution to degradation. As such, the mass balance model approach should not be seen as part of the analytical materials and methods, but as a quantitative discussion of our analytical results including the development of model equations. For example, the derivation of the slope and intercept in the DIC\* versus  $\delta^{13}\text{C}_{\text{DIC}}$  plots is not possible without prior analytical results, and neither is the derivation of the relative contributions of marine and terrestrial matter possible without prior analysis of total fluxes. We feel that splitting this part into the materials and methods section and in the discussion section would actually not reduce, but increase the length of the manuscript without adding clarity and lead to dissected information. We would therefore like to retain the present structure in some parts. However, there are other parts, where we agree with the reviewer and these sections will be moved to results and methods, where appropriate.*

Some results are even discussed before Methods and Results are presented, which makes the manuscript hard to read. I suggest thoroughly rearranging the manuscript according to the classical structure of research manuscripts and shortening the manuscript by removing reiterations.

*Answer: We will try to find all unnecessary repeats and remove them to shorten the manuscript as much as possible.*

In particular, the description of the authors approach of partitioning total organic carbon degradation into terrestrial and marine sources needs substantial attention and should be clearly divided into a description of Methods, Results and Discussion (see below).

*Answer: Please see our comment above. The derivation of the equations should be part of the discussion to aid in the flow of the argument in the discussion text, but we will, for example, move parts of the reaction transport model and the carbon equivalent assignment of anaerobic carbon degradation to the methods and results.*

In this context, I missed the carbon concentrations in the sediments and their stable

isotope signatures. I assume the authors measured them and they will help to interpret the results of the “modelled”  $\delta^{13}\text{C}$  signatures of respired organic matter.

*Answer: Yes, we have concentrations and  $\delta^{13}\text{C}_{\text{org}}$  values for some, but not all sediments. We have revised the manuscript to cite these references where data are available (some weren't citeable at the time of the original writing, but are now. Since the manuscript already has many data we chose to focus on the novel rates and porewater chemistry instead. There are already a number of publications of the  $\text{C}_{\text{org}}$  and  $\delta^{13}\text{C}$  contents of these sediments (e.g., Vonk et al, 2012; Bröder et al., 2016 a,b, Karlsson et al. (2015), Salvado et al., 2016) and we wished not to reiterate similar data that were already published.*

Most of the data seem being related to anoxic carbon degradation processes, excluding aerobic organic matter turnover, although oxic processes are responsible for most of the organic carbon decomposition in the studied sediments. The authors should clarify throughout the whole manuscript if they relate to total, oxic or anoxic carbon decomposition.

*Answer: Although we have been very clear to our opinion in distinguishing the aerobic from the anaerobic degradation processes, we will carefully reevaluate the text where this distinction may be obscure.*

The conclusions are very long and mainly a reiteration of the results and the discussion. It should be shortened substantially.

*Answer: We will carefully evaluate where re-iterations occur and remove them, when necessary. However, we do not agree with the reviewer that our conclusions just reiterate the results. Instead, the conclusions put the discussion into the greater context of the overall Arctic marine carbon cycle and some of the debated questions on the likelihood whether sediment-based terrestrial carbon degradation contributes ocean acidification in this region.*

Specific comments:

L 29: Please give the depth used for integrating

*Answer: 30 cm of sediment; revised*

L 48: These C amounts are stored in soils of permafrost landscapes. In the permafrost itself only 800 Pg are stored, see Hugelius et al. 2014. Please rephrase.

*Answer: Hugelius et al (2014) state that 800 Pg are in perennially frozen permafrost, whereas they state that the estimated SOC storage ranges between 1100 to 1500 Pg. We are referring to the latter number.*

L 56: “qualitatively different rates” is unclear, please rephrase.

*Answer: We agree that qualitative is vague, but this is because the literature is often vague on rate constants. Here the term 'qualitative' refers to the widely used characterization of very reactive as opposed to unreactive organic material without specific reference to a degradation rate constant.*

L 146 omit one “dissolved”

*Done.*

L 154-155: This is a reiteration from 2.1; please remove one of the descriptions.

*Answer: removed "undisturbed sediment surfaces and ..".*

L 176 – 200: Please indicate where the measurements were done (on the ship, in the home lab) and how the samples were transported.

*We have inserted the following sentence: Ammonium was determined on a QUAATRO 4-channel flow injection analyzer (Seal Analytical) on board. All other porewater analyses were performed at the Department of Geological Sciences, Stockholm University. Samples that were analyzed in the home laboratory remained cold or frozen on board until arrival of the icebreaker Oden in Sweden*

L221-223: Reiteration from 2.1, please remove one of the descriptions.

*Removed one "concentration"*

L256: Please describe how texture was determined.

*Answer: This is a qualitative descriptor of the sediment based on visual inspection. No detailed grain analysis was performed.*

L 257: The designation of colors throughout the sediment description is not unambiguous. Please use an accepted color system such as Munsels.

*Munsell's colour chart was not used in the description. Unfortunately, we do not have sediment cores left to compare these to a colour chart. We have instead used colour descriptions that are commonly used for describing sediment cores from the Ocean Drilling Program.*

L 296: These data are not presented in Table 2 and it seems they are not presented in the manuscript at all.

*We inserted these numbers into Table 2 (modelled/measured) O<sub>2</sub> uptake*

L 341-342: Please identify the station.

*Inserted: Stations 6 to 24*

L 352-356: Here the presentation of the carbon concentration data are needed. Furthermore, to better illustrate changes in organic matter reactivity, SRR should also be presented normalized to organic carbon.

*For information, the  $\delta^{13}\text{C}$  of these sediments vary between -26 ‰ in the Laptev Sea to -20 ‰ in the easternmost Siberian Sea (Salvado et al., 2016, Biogeosciences). The carbon concentrations on the outer shelf vary between 0.4% and 1.5% (Bröder et al., 2016b Org. Geochem, Salvado et al., Biogeosciences, pers. data, unpubl.).*

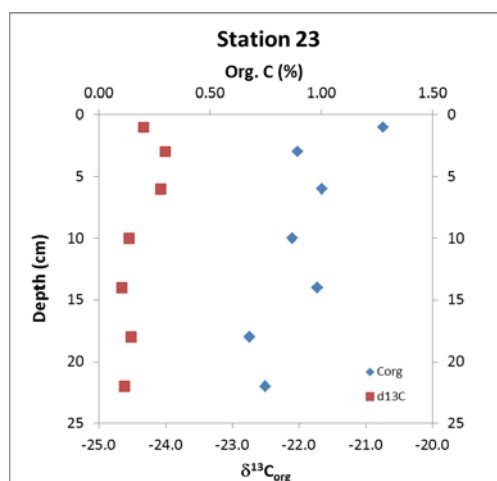

*We attach here a depth profile of organic carbon (%) and  $\delta^{13}\text{C}_{\text{org}}$  from Station 23 to support our point. There is little variation in the  $\delta^{13}\text{C}$  data with depth. C<sub>org</sub> concentrations decrease from about 1.3% to 0.8 %, a 40% decrease. Similar profiles can be found in Bröder et al (2016b, Org. Geochem.). It may be argued that the higher C<sub>org</sub> concentrations in the topmost cm reflect more degradable organic matter,*

*but the decrease in the actual anaerobic degradation rates with depth (Fig. 3) is much larger, more than a factor 8! Scaling the rates to  $C_{org}$  concentrations therefore will show the same trend and imply that the reactivity refers to the bulk org. C, which in fact is not true. We have chosen instead to use the conventional unit of  $^{35}\text{S}$ -sulfate reduction rates per volume sediment ( $\text{nmol cm}^{-3} \text{ d}^{-1}$ ), which allows comparison of these rates to the large global database of marine  $^{35}\text{S}$ -sulfate reduction rates.*

L 360: Decrease or increase of DIC? Furthermore, data of Station 50 should be presented in Fig. 4 if they are given in the text.

*Answer: Decrease was corrected. We meant "increase"*

L 368: Please indicate where the rates of sedimentation are shown.

*Answer: We have removed 'sedimentation' from the sentence. We infer that sedimentation rates would have decreased abruptly at this depth, because the change in sulfate reduction rates over 1 cm depth cannot be explained by a steady exponential decrease in organic matter reactivity.*

L 381-387: This are results that should be presented in the Results section.

*Answer: The mixing coefficients derived here are the result of the optimization procedure and a specific result for the different stations and will be moved there. We therefore propose to move the reactive transport modeling results into the results section.*

L 395: This is a discussion of results that were not shown. Please show these results in the Results section before discussing them.

*Answer: See above.*

L 418: Table 4L 488-502: This is a description of methods, which should go to the Methods.

*Answer: We will add a section to the materials and methods on the calculation of the carbon equivalents*

L 498: Please clarify "no or very minor". Was isotope fractionation considered or not?

*Answer: It was not.*

L 500: What means minor. Please show the formula for the calculations.

*Answer: Minor to the extent that it cannot be analytically detected based on  $\text{Ca}^{2+}$  and  $\text{Mg}^{2+}$  porewater concentration decreases. The calculation refers to equation (3) in line 492.*

L 502-506: This should go to the Results.

*Answer: We will move this sentence to the results.*

L 505: -35.8‰ is a very low stable isotope value for organic matter, even lower than found for terrestrial organic matter in the hinterland of the Laptev Sea. To assess the significance of this value the stable isotope signatures of the bulk organic matter are needed. Is it possible

that methane oxidation contributed to DIC? Are methane concentration values available and can they be referred to?

*Answer: Miller et al. 2016 (Biogeosciences) discuss this issue extensively and have come to the conclusion that methane in general and methane oxidation play no role for the porewater chemistry on the East Siberian slope. We were also surprised by the strong decrease with depth in  $\delta^{13}\text{C}$  DIC. To check the validity of our results we have simulated depth profiles of DIC assuming degradation of a terrestrial organic matter component with an isotope composition of -28‰. However, such a heavy component requires substantially higher carbon degradation rates to match the decrease in  $\delta^{13}\text{C}$  of DIC, which does not agree with the rates of oxygen uptake, iron and manganese and sulfate reduction measured here. Further, we considered whether there was loss of  $^{13}\text{C}$  by precipitation of  $\text{CaCO}_3$  from porewater. This is, however, also not further substantiated based on  $\text{Ca}^{2+}$  and  $\text{Mg}^{2+}$  porewater concentrations and the greater likelihood for  $\text{CaCO}_3$  dissolution than precipitation under the conditions on the lower slope at 3146 m water depth. Given that there are no good alternative explanations or handling artefacts, we present these values as indicating a strongly  $^{13}\text{C}$ -depleted terrestrial signature, although the bulk  $\delta^{13}\text{C}_{\text{org}}$  for this station (Tesi, unpubl. Data) is around -24 to -25‰.*

L 525- 538: This is a method description and should go to the Methods

*Answer: For the sake of the flow of the discussion, we would like to retain this section in place. It is part of our analytical approach to discussing our data and should not be seen as being strictly part of the analytical section of the raw data.*

L 539 – L542: These data should be presented in the results.

*Answer: We argue for the same reason as above to retain this part.*

L 545 – 570: This paragraph again contains mostly a description of methods. The description was also not completely clear to me. Better present the respective formula used for partitioning degradation rates into terrestrial and marine sources. Furthermore, I understood that the authors only considered organic matter degradation via sulfate reduction. If this is the case, it should be made clear, that this approach gives no information on most of organic matter degradation in the sediments (aerobic processes), which likely consume the most labile fraction of deposited organic matter.

*Answer: To our knowledge, this is the first time such an approach has been used to extract specific marine and terrestrial carbon fraction degradation rates. The reviewer is correct and this is what we have stated in the text.*

L 571 – 573: I cannot see that the data in Fig. 7 shows the “influence of offshore transport of terrestrial organic matter”. The figure rather shows decreasing O<sub>2</sub> consumption rates and SRR from the shelf down the slope. Please clarify. Furthermore, the remineralized DIC  $\delta^{13}\text{C}$  data from Table 3 rather show increasing terrestrial influence down the slope. How does this relate to the data in Fig. 7?

*Answer: The sentence is intended to provide an explanation for the observed decrease. As discussed earlier in the text, terrestrial organic matter is transported offshore and molecular organic studies have shown that the reactivity of this organic matter decreases offshore, consistent with the observed decrease. The  $\delta^{13}\text{C}_{\text{DIC}}$  data from the slope reflect the carbon degradation processes in deeper, buried sediment. These are apparently to a large extent driven by terrestrial organic matter degradation, albeit at low rates.*

L 606: outer Siberian shelf sediment

*Answer: corrected*

L 609: Please show the carbon data in the Results.

*Answer: Carbon concentration data can be found in Bröder et al (2016) Biogeoscience Discussions and Salvado et al (2016) Biogeosciences. We add a citation to the text.*

L 622 – 627: This should go to the Methods. Please clarify how the “degradation rate constant of organic matter” (L 620) can be determined by the anaerobic carbon mineralization (L 622) if latter only contributes 4 to 26% to total organic matter turnover in the sediments (Table 4).

*Answer: We move the analytical approach of this section to the methods section. We are specific that this is the anaerobic degradation rate constant. We also show that the oxygen consumption rates are significantly faster than the anaerobic rates, but our isotope approach cannot resolve the origin of the carbon used for aerobic respiration. We agree with Boetius and Damm (1998) that in principle the marine export is large enough to account for all the oxygen uptake, but this does not disprove that a fraction of terrestrial organic matter is also degraded aerobically. Unfortunately, we cannot resolve this question satisfactorily.*

L 635: anoxic degradation rate measurements?

*Answer: Yes, anaerobic degradation rates is what is meant here.*

L 648-650: This sentence should be rephrased since it is unclear. Which implications? If only anaerobic degradation rates are used in the assessment, isn't it obvious that no information on aerobic decomposition can be derived?

*Answer: We will rephrase this sentence. It is important to point out explicitly that all common field measurements of O<sub>2</sub> consumption at the sediment surface cannot distinguish a marine from a terrestrial carbon contribution for a mixed source. We feel this is an important point to make, because degradation of terrestrial-derived carbon can only be achieved with additional experiments using isolated sediment from only the oxygenated layer of the sediment. Given that this layer is only a few millimeters thick, this is not a trivial task and could not be achieved within the framework of this study. Nevertheless, we provide a range of previously unknown baseline data for this region, but want to point that other existing published assessments of terrestrial carbon degradation rates on the Siberian shelf are insufficiently constrained.*

L 654 – 656: These results should go to the Results section.

*Answer: This section will be moved to the results.*

L 654 – 661: Where are these data shown? Only in text of the discussion?

*Answer: This section will be moved to the results.*

L 659: This sentence is unclear. Regression line of which data? How do you come from a slope of 5.6 to 18%?

*Answer: This is the inverse of the slope of 5.6*

L 663 – 664: The numbers for the contribution of anaerobic organic matter decomposition to total organic matter decomposition are given in Table 4 and are generally lower than 18%. This should be discussed.

*Answer: This is the consequence of two methods, (1) the regression analysis and (2) the carbon equivalent apportionnement of the anaerobic degradation processes.*

L 664 – 666: I cannot follow this conclusion. If the contribution of anaerobic organic matter decomposition is only slightly lower (L 661) this means only that (relatively) more organic matter is degraded aerobically but I do not see any information on “highly reactive marine-derived organic material”. Please rephrase.

*Answer: We try to clarify this by modifying the sentence. In case there is a misunderstanding, an explanation needs to be found for why there should be a greater proportion of aerobic respiration in the Siberian shelf sediment compared to other shelf sediments. We think a viable explanation is that there is a highly reactive marine fraction in the topmost millimeters of sediment that is not present any longer in the buried sediment, where very unreactive terrestrial organic matter prevails. Most shelf sediments with stronger marine C<sub>org</sub> contributions in temperate regions would not have such a binomial C<sub>org</sub> origin of widely different reactivities and a greater proportion of marine C<sub>org</sub> would be buried. Hence, the reducing equivalents produced by anaerobic respiration in the Siberian shelf sediment make up a proportionately smaller fraction of the oxygen consumption compared to other shelf environments.*

L 711 – 712: Can these data please be presented in the Results?

*Answer: Our rates were compared with the figures in Bourgeois et al (2017). These are largely interpolated results or derived from the rates by Boetius and Damm (1998), which are already part of Figure 7 A, B.*

L 725 – 728: As I understand this relates only to anaerobic organic carbon mineralization. Please clarify.

*Yes, this is true. For the reasons that the fine-scale processes in the aerobic zone are not resolvable with the porewater analysis used here, the modelling of the porewaters refers to the anaerobic processes.*

L 748 – 151: This sentence is unclear. The manuscript did not present any data on priming. How would priming be assessed by this dataset? How can priming be “deduced from the dual contribution of terrestrial and marine-derived organic matter to DIC”? I suggest omitting any reference to priming or show a dataset that relates to priming.

*Answer: We will remove the discussion on priming.*

L 1127-1129: Please quote the respective reference.

*Answer: The data are from Canfield et al., 2005; Aquatic Geomicrobiology; we will add this.*

Table 2: Please give mean values also for SRR and O<sub>2</sub> uptake at the East Siberian Shelf and standard deviations for all mean values. Furthermore, indicate why a part of the data are missing.

*Answer: In the revised version, this has now been done. In addition, we show values from the total oxygen uptake and for the DIC flux based on the whole-core flux experiments.*

Table 5: please explain TEAP

*Answer: TEAP are Terminal Electron-Accepting Processes after Stumm and Morgan (2006) Aquatic Chemistry; We have added the full term to the text.*

Figures 2-5: please give the legend at least in one of the panels.

Fig. 4 + 5: The \_-symbol in the axis name is missing

*Answer: This is a conversion error from Excel to pdf. We will correct this.*
